# Supplementary material
Source: Springer Nature journal article supplement (https://www.springermedizin.de/resource/supplementary/13000_2014_1116_MOESM7_ESM.pdf/9625884)

**A**

Mock

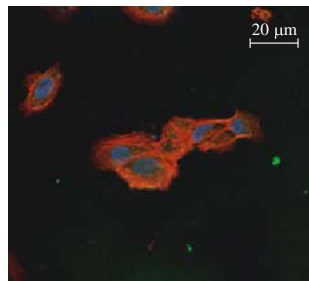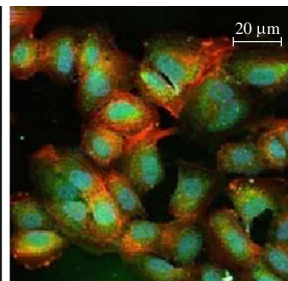Sirt7  
siRNA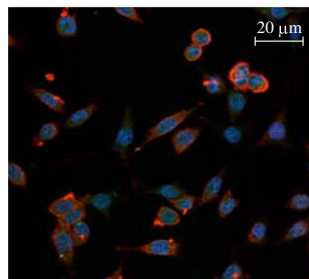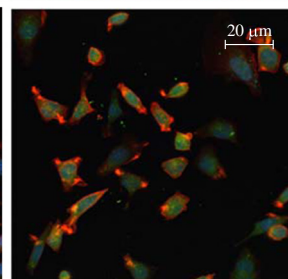**Insulin****Concentration (nM):****0****1000****B**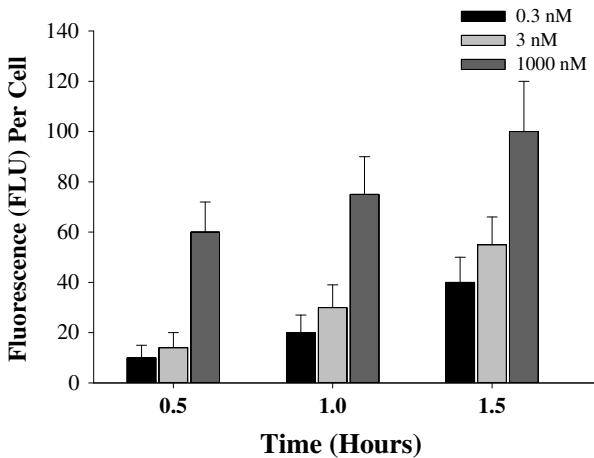**C**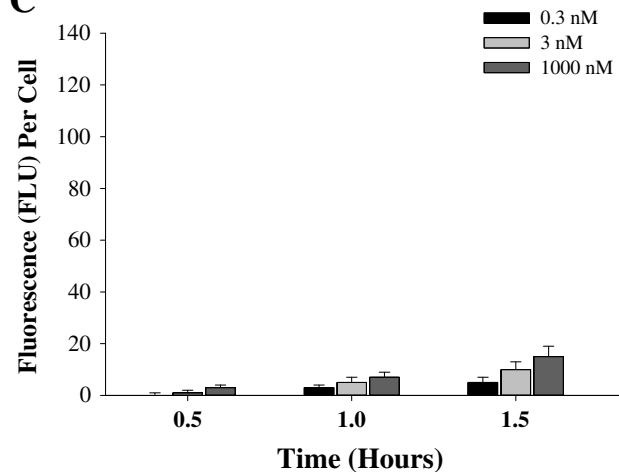

Supplement: MOESM7 [file 9625884]
